# Supplementary material
Source: PubMed Central journal article supplement (PMC8647143)

**Figure 6**

6B:

PTEN:

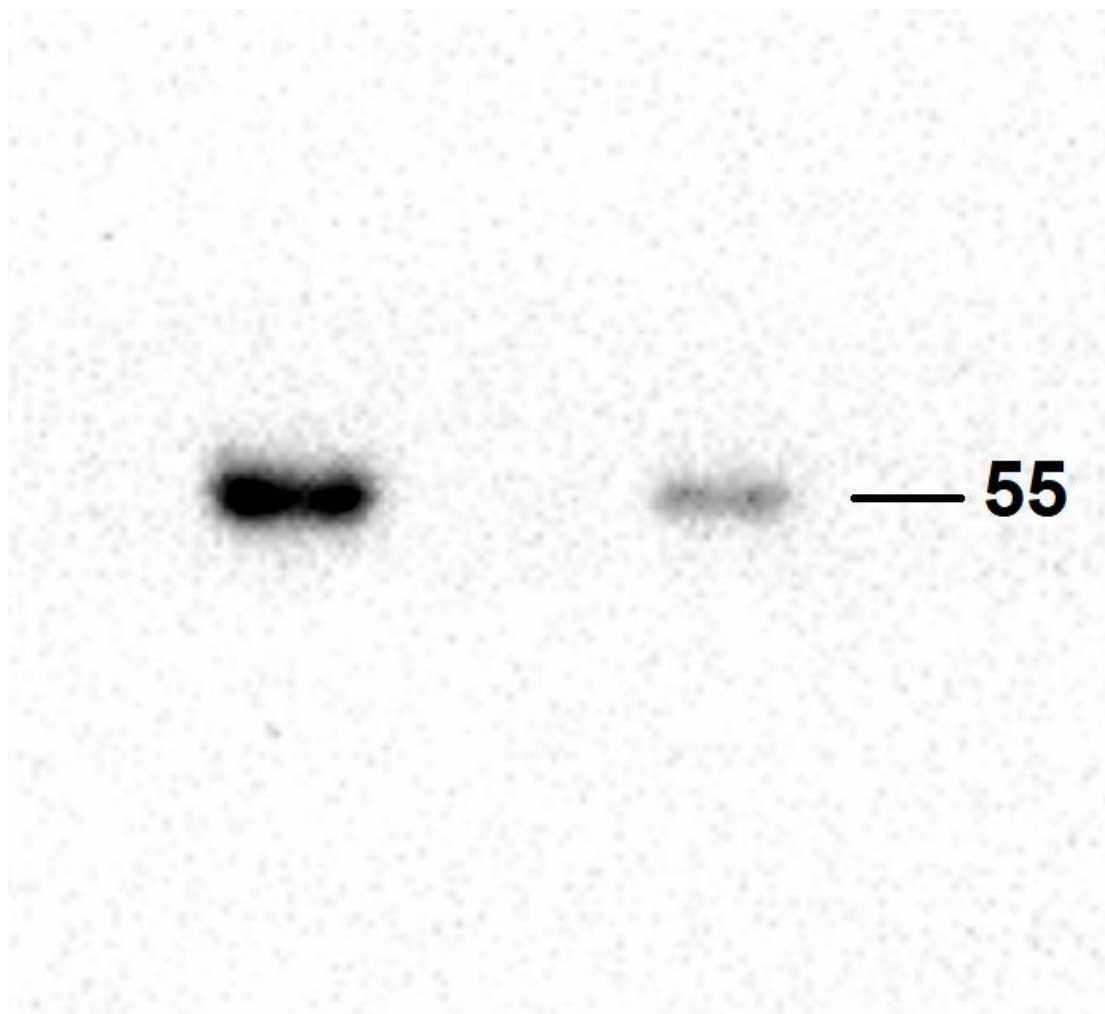

NEDD4-1

:

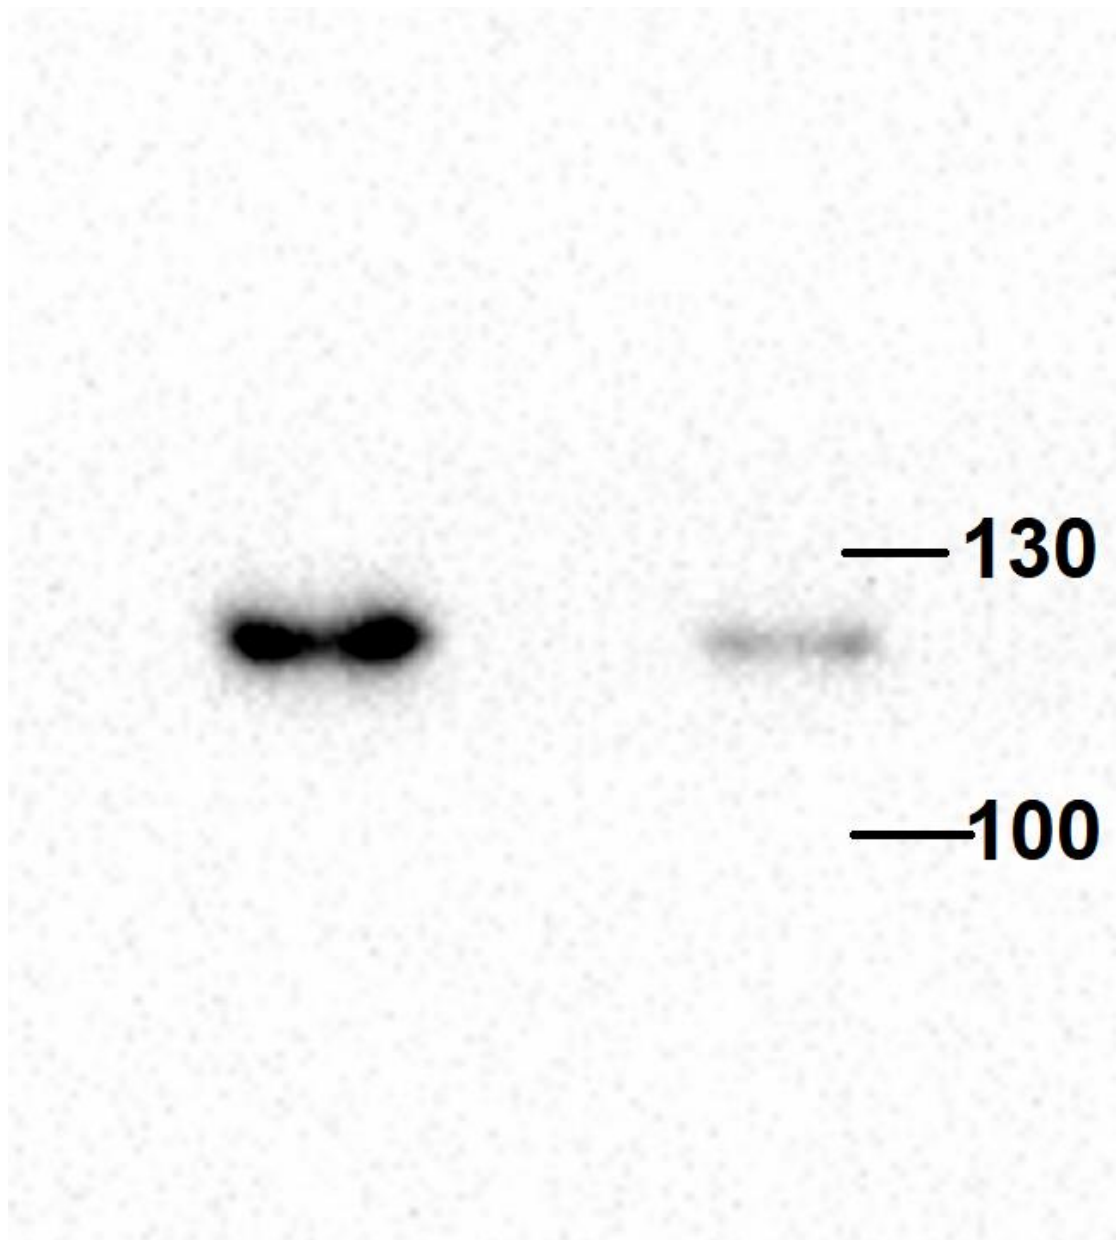

6C:

IP: NEDD4-1

IB: PTEN:

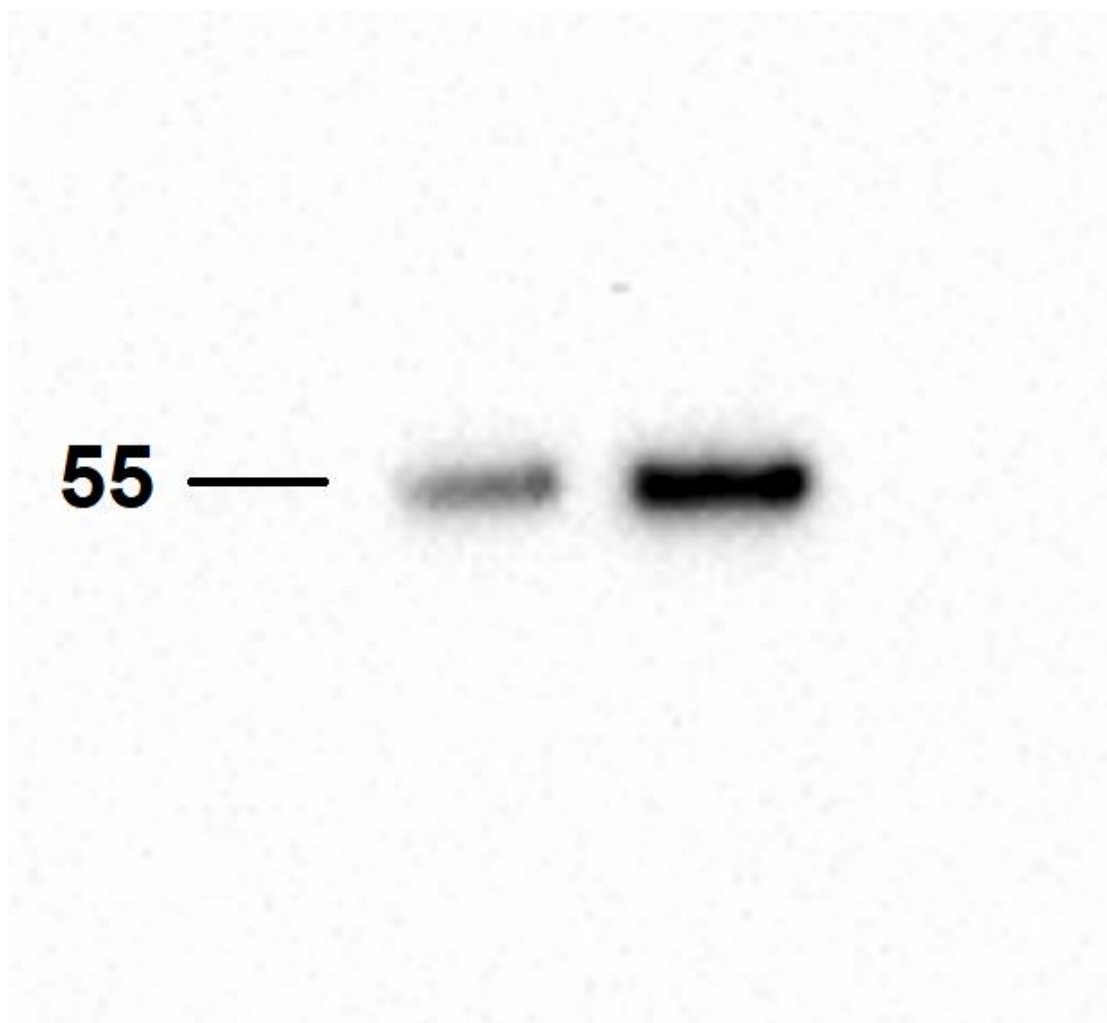

IB:NEDD4-1:

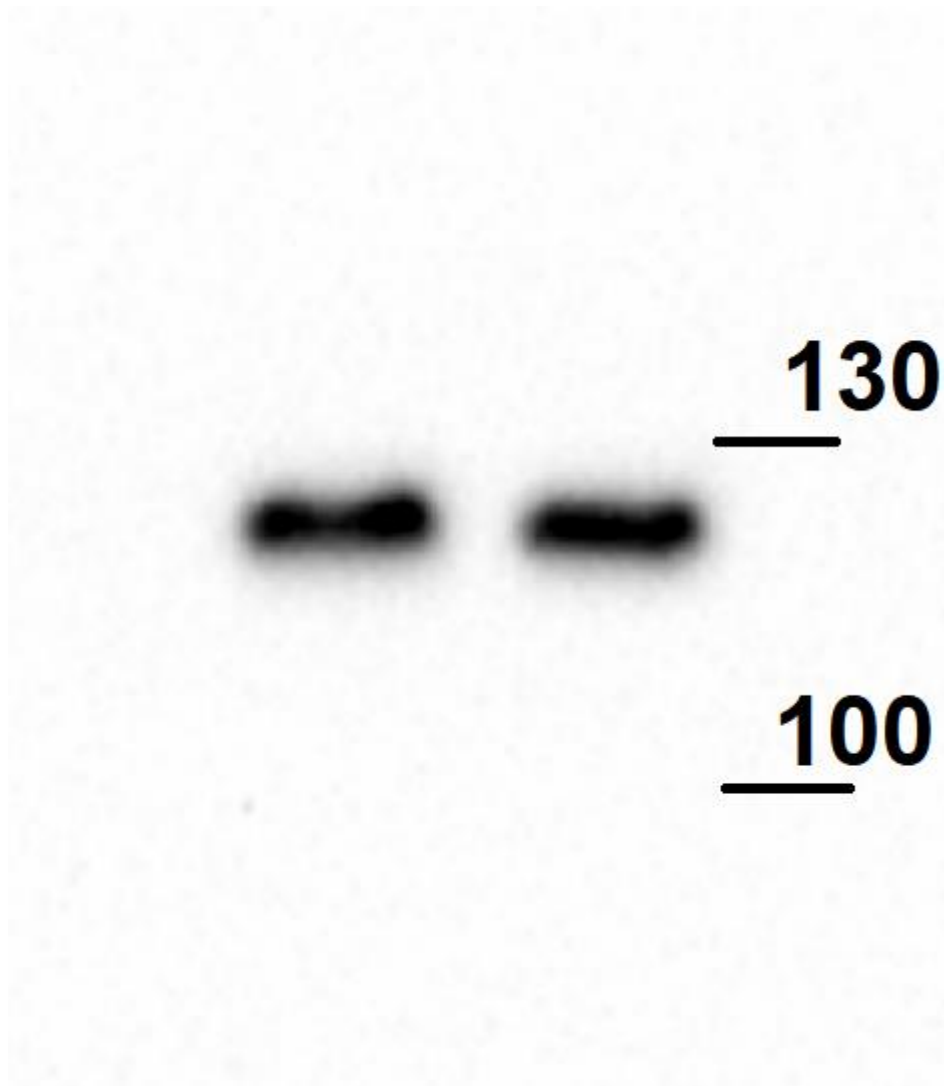

Input:

PTEN:

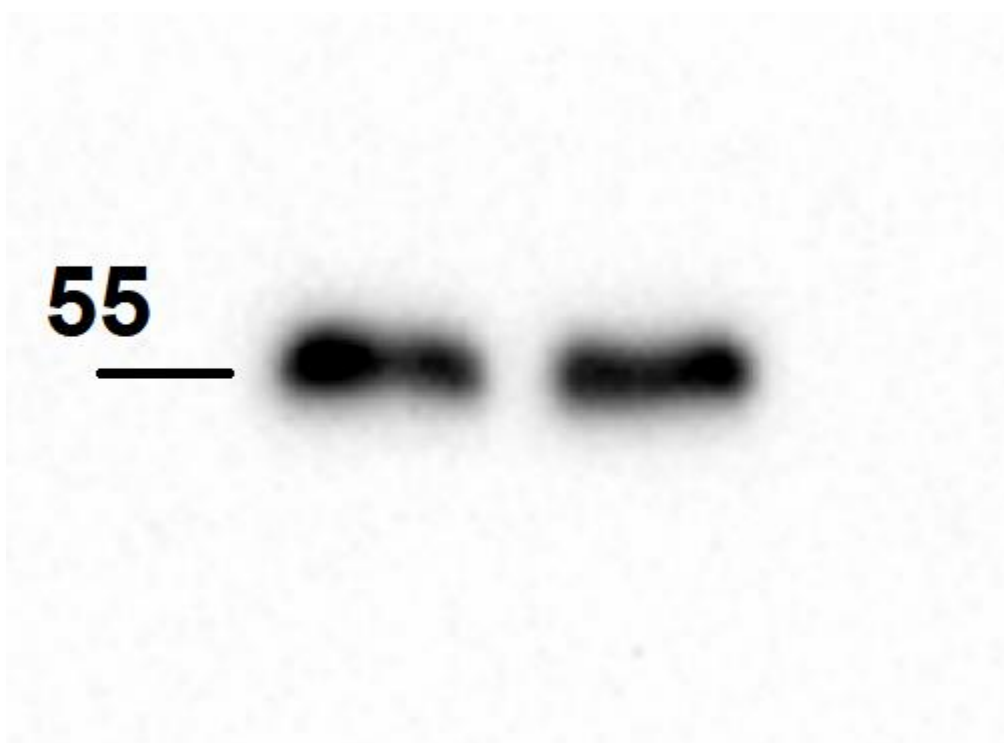

GAPDH:

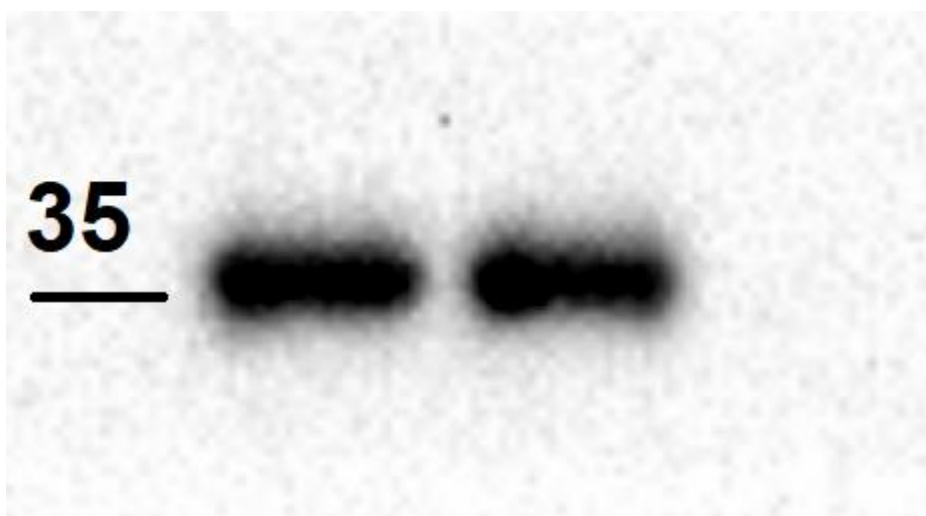

IP: PTEN

IB: NEDD4-1:

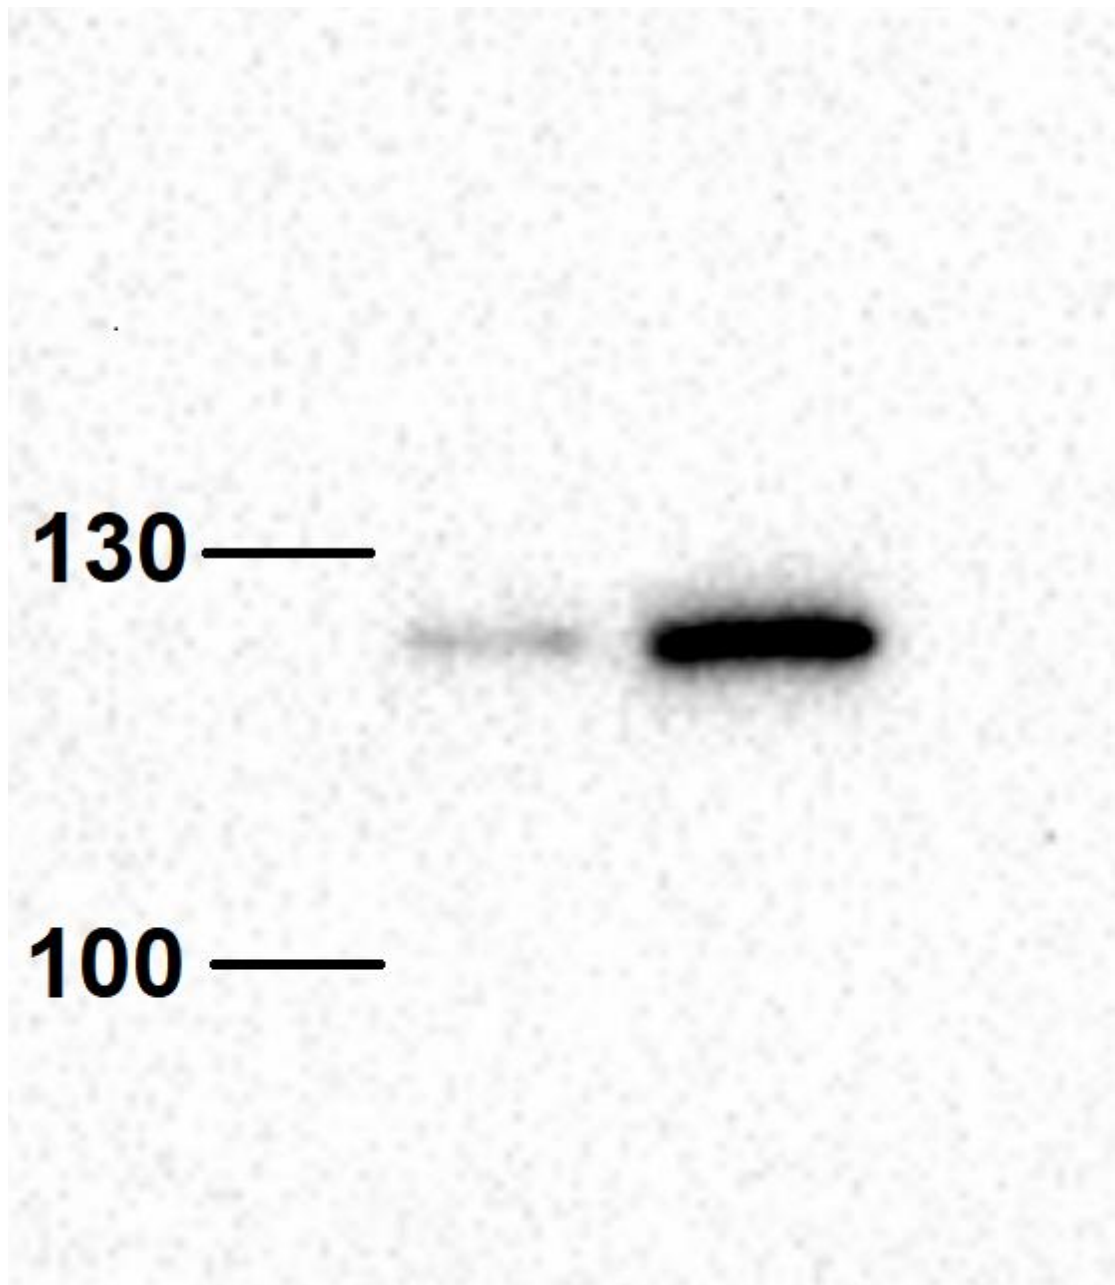

IB: PTEN:

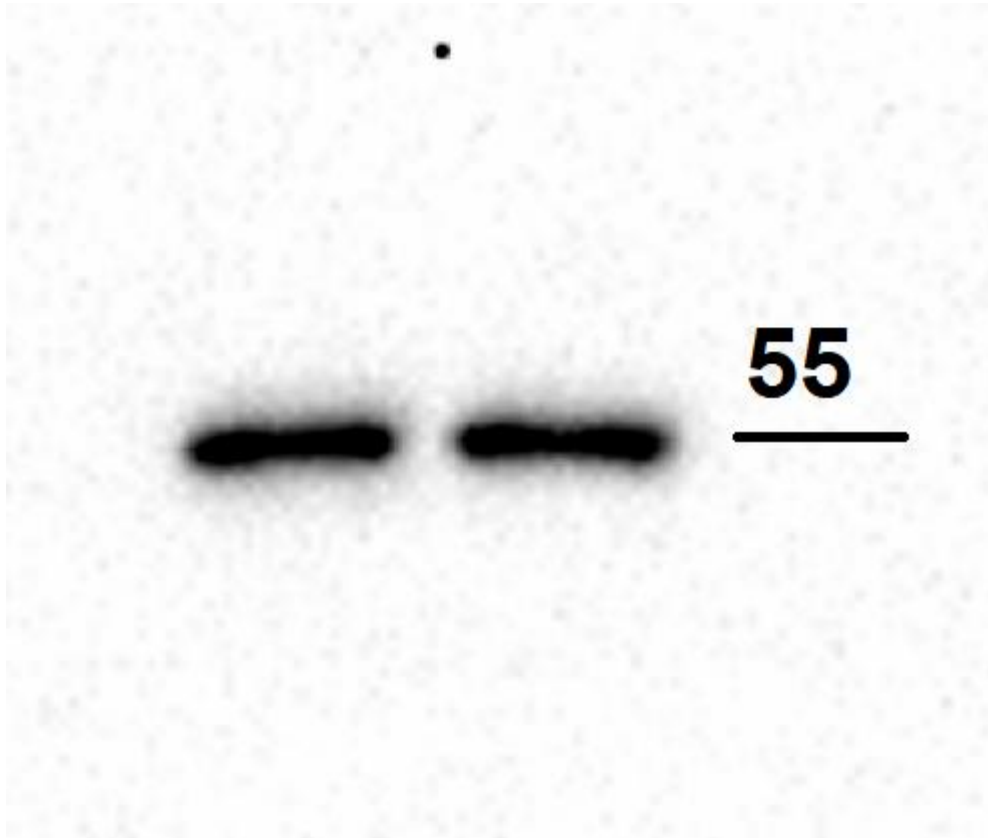

Input

NEDD4-1:

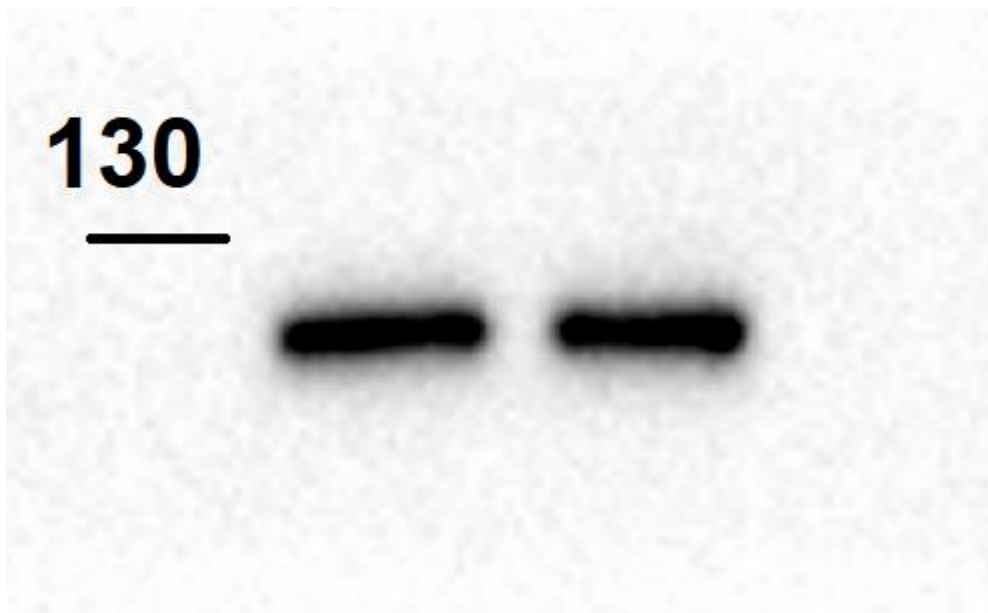

GAPDH:

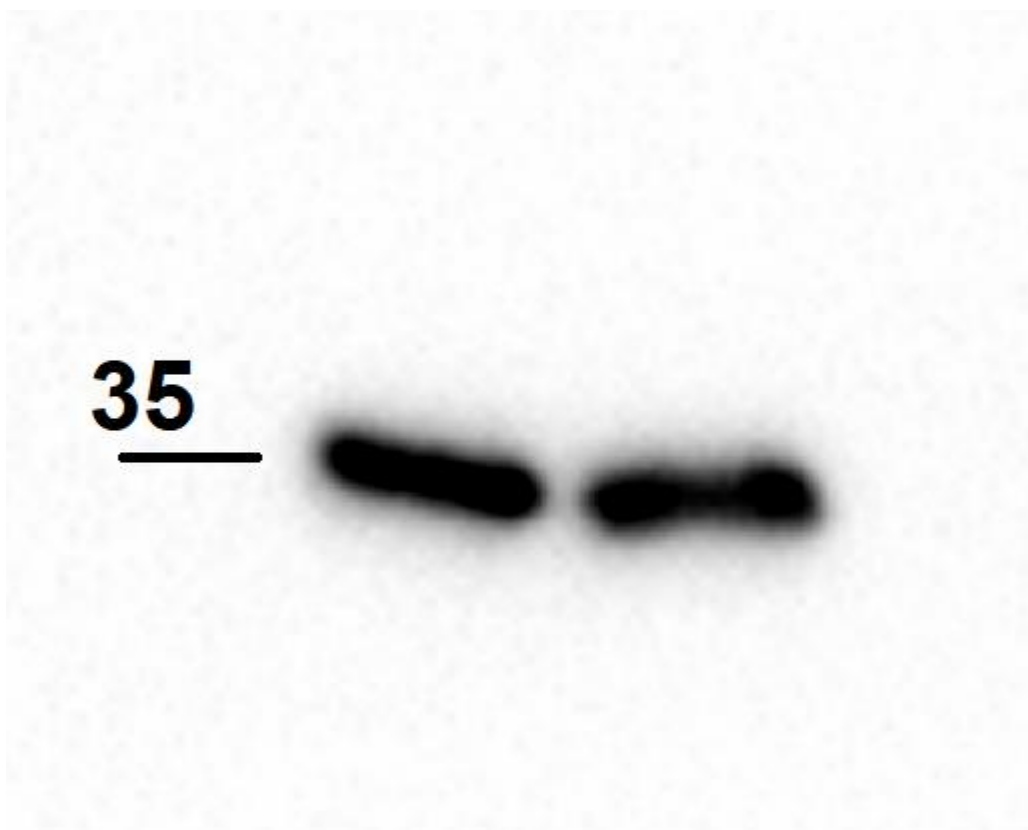

6D:

PTEN:

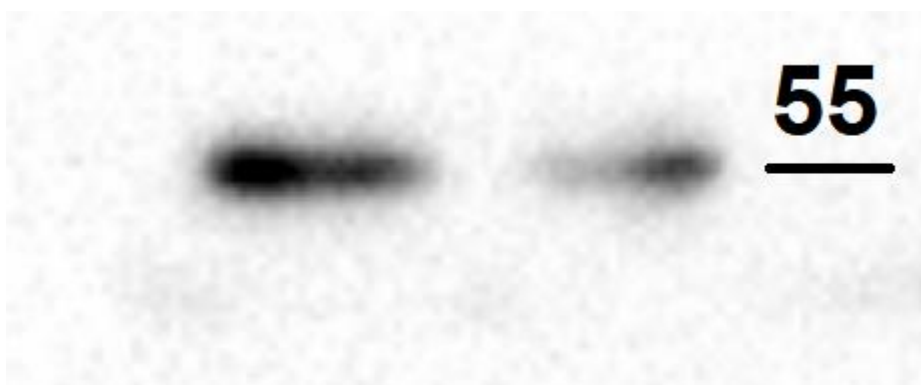

NEDD4-1:

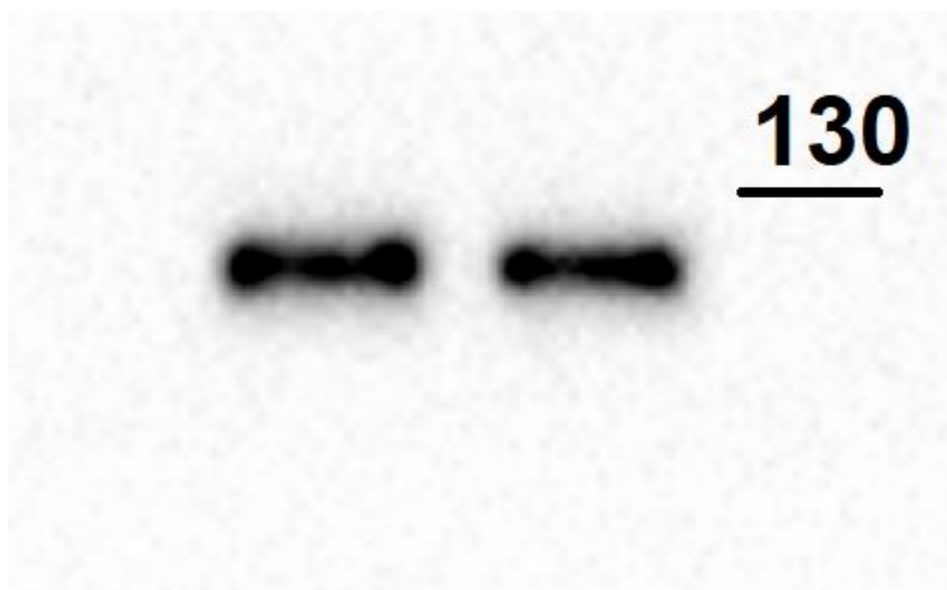

GAPDH:

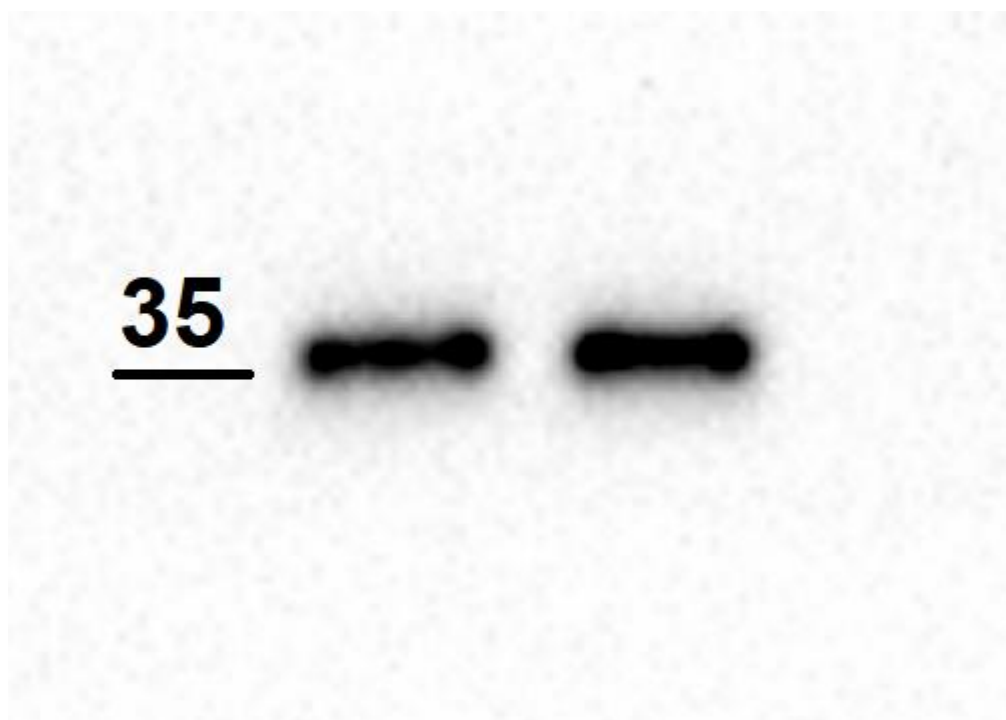

6E:

PTEN:

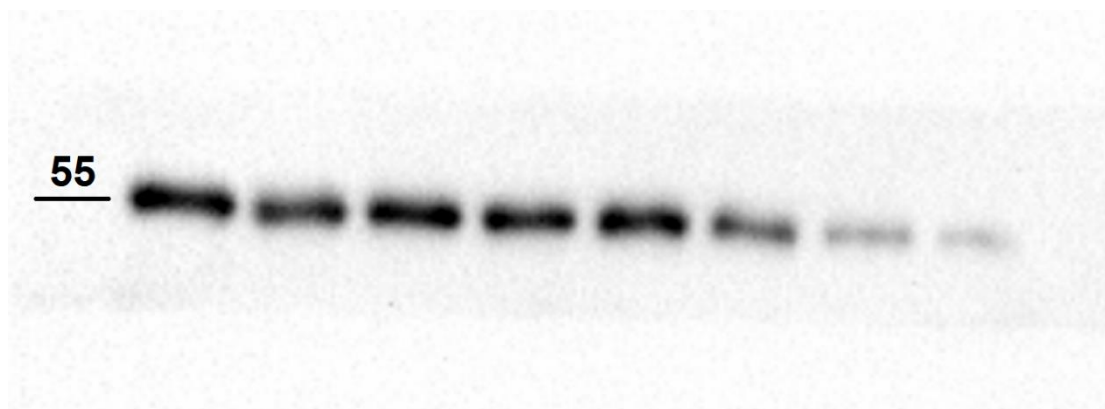

NEDD4-1:

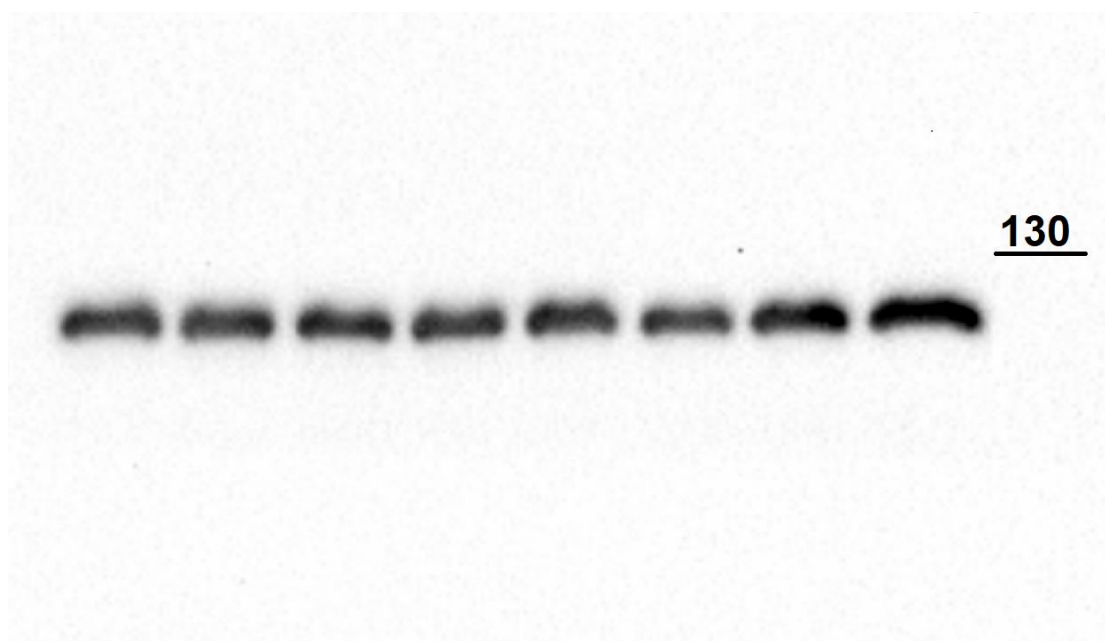

GAPDH:

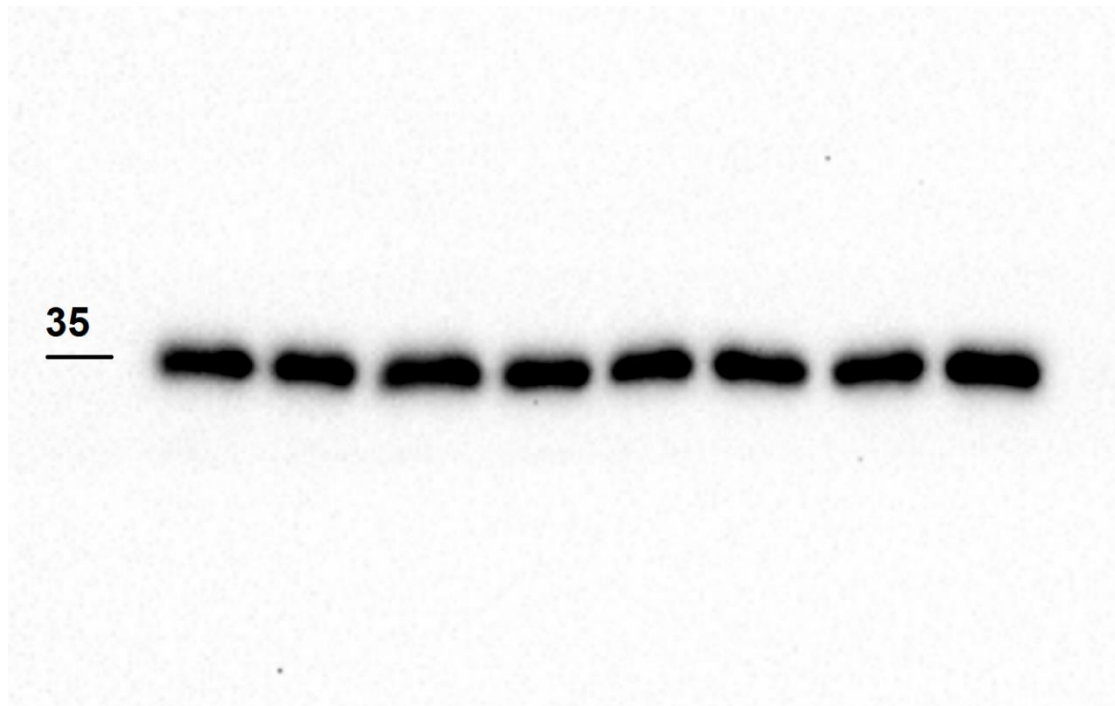

6F:

PTEN-(HA-Ub)<sub>n</sub>

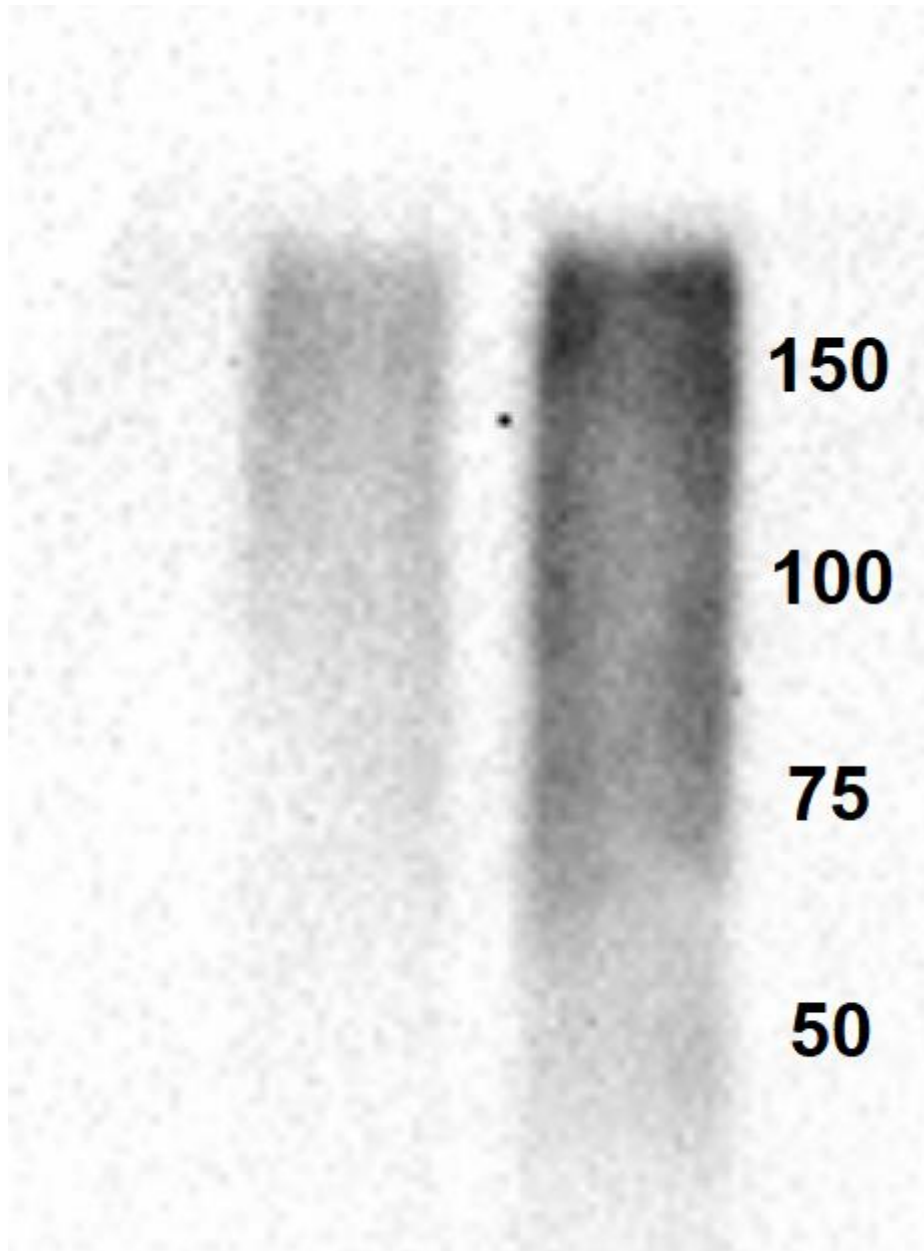

GAPDH:

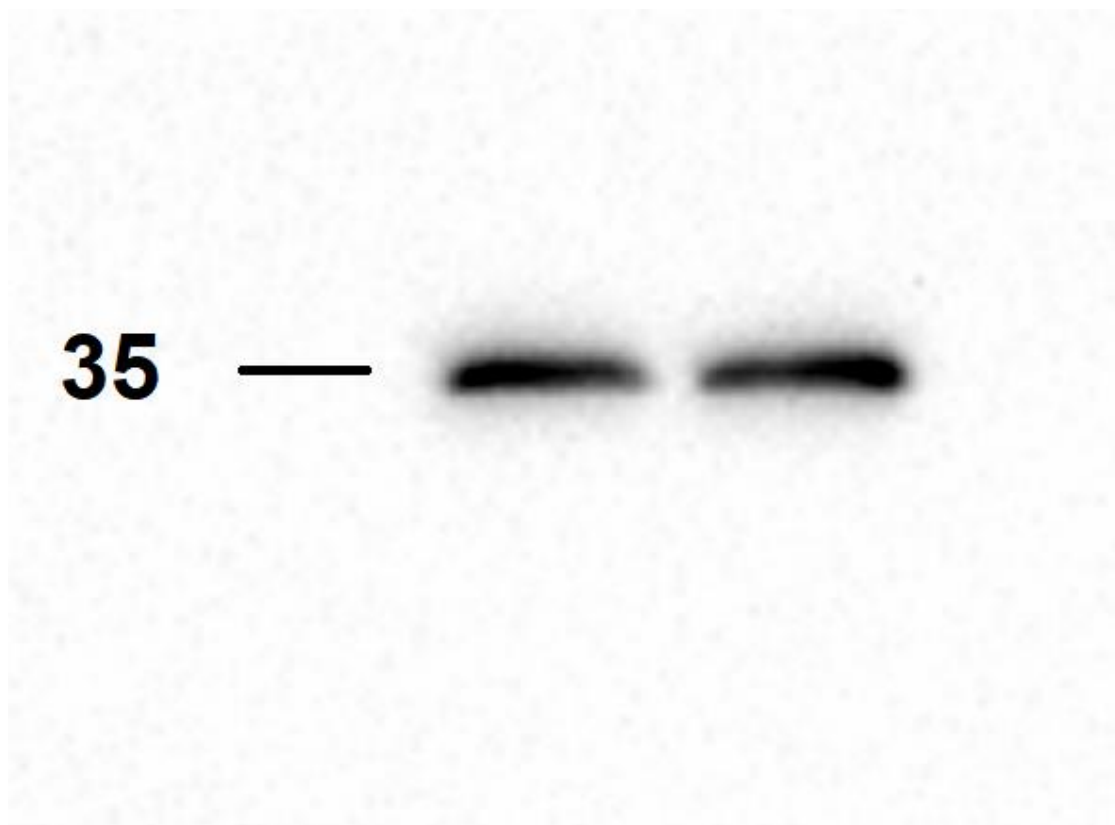

6G:

PTEN-(HA-Ub)<sub>n</sub>

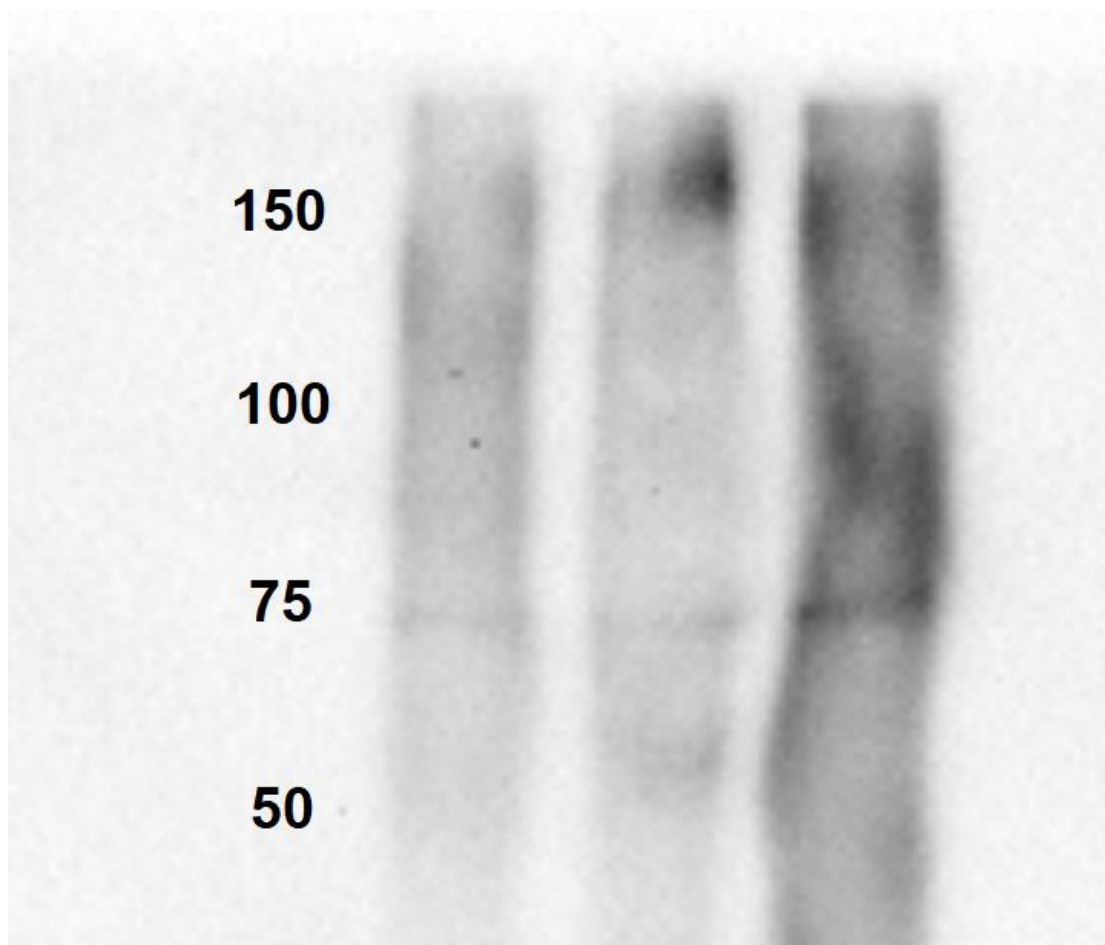

Myc:

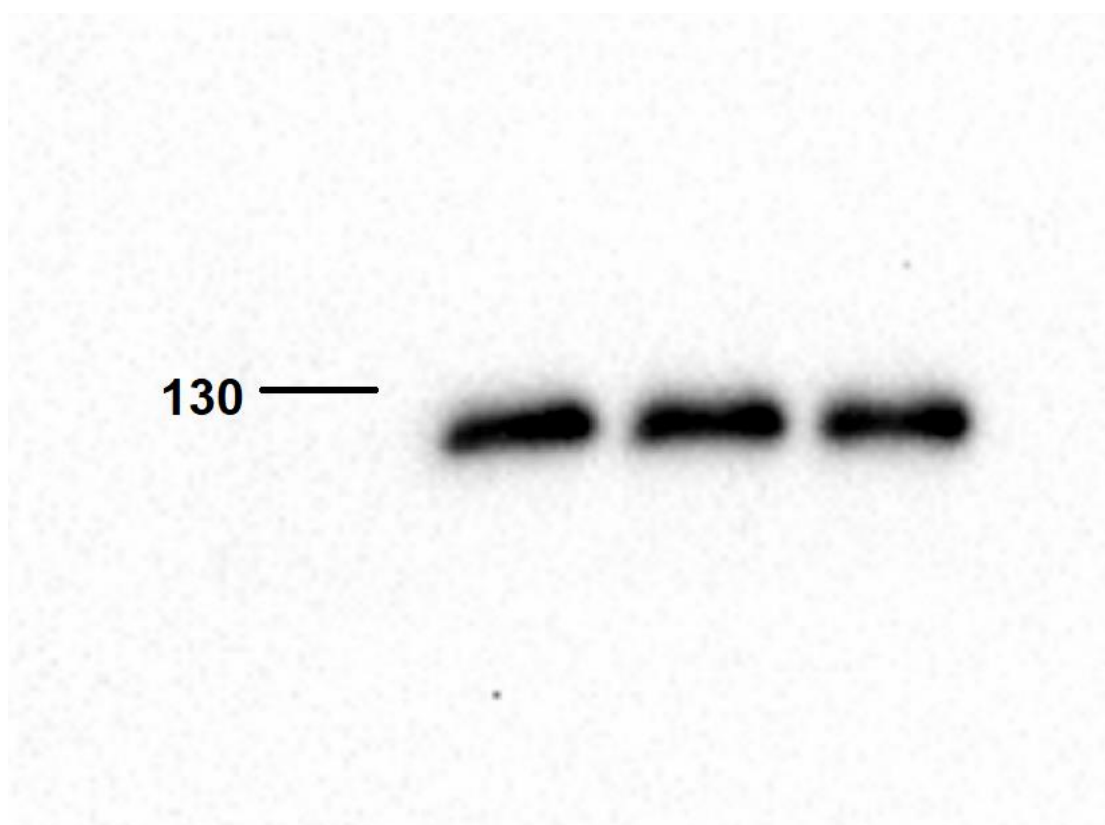

Flag:

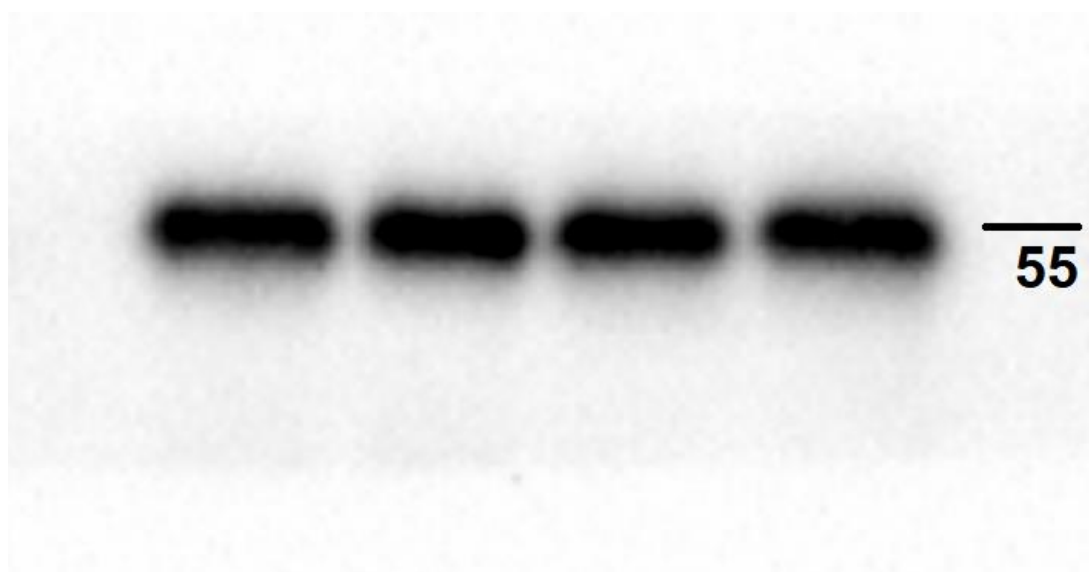

Supplement: EMBR-22-e52124-s001.pdf [file EMBR-22-e52124-s001.pdf]
