# Supplementary material
Source: PubMed Central journal article supplement (PMC8647143)

**Figure 2**

2C:

BMDMs, PBS, and BMDMs-exo groups:

Calnexin:

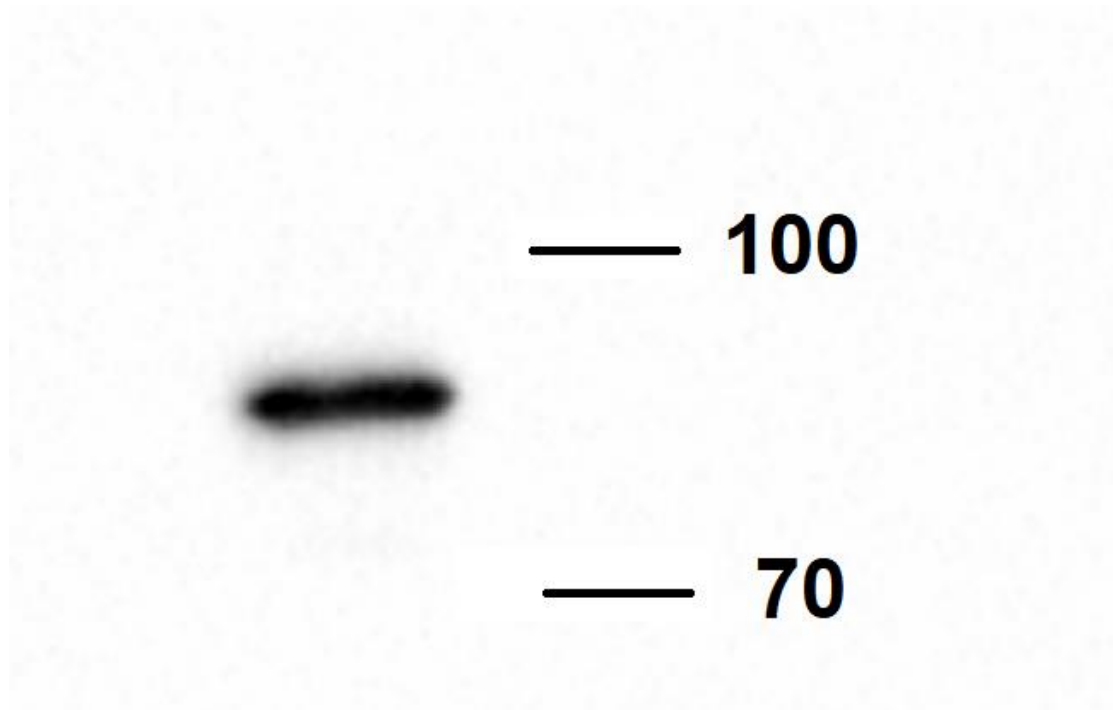

CD63:

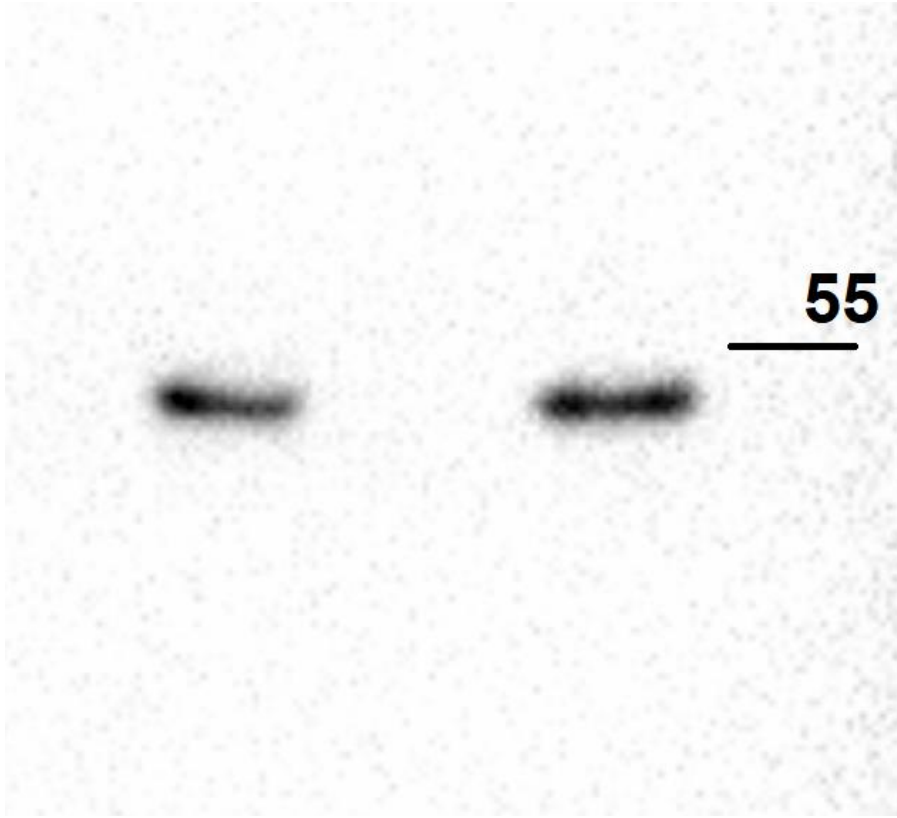

CD81:

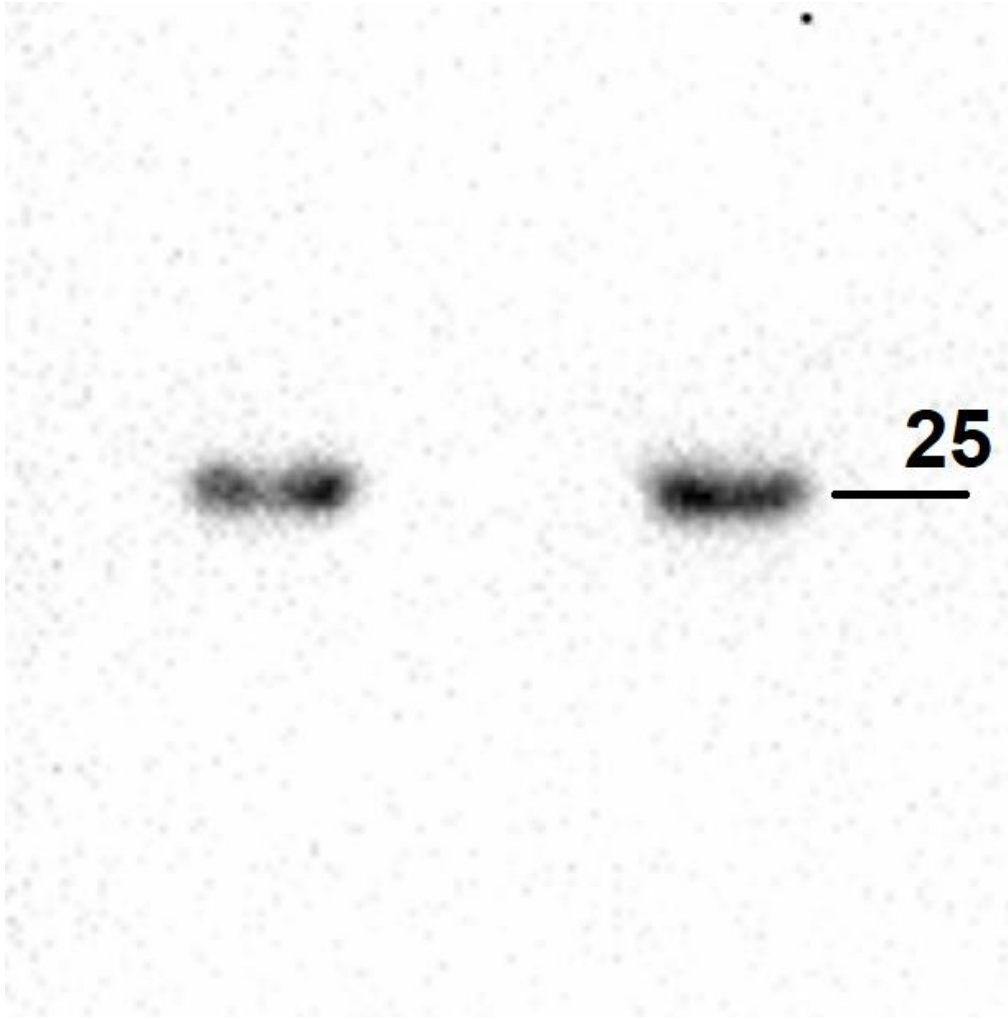

M2, PBS, and M2-exo groups:

Calnexin:

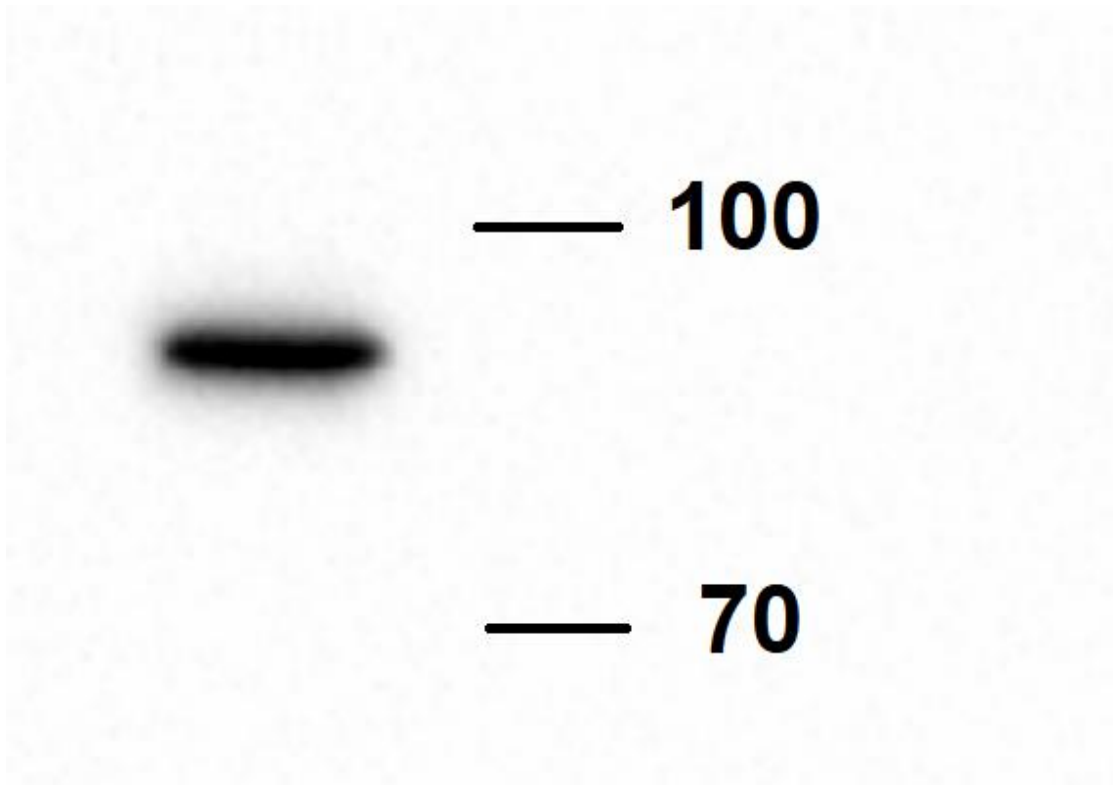

CD63:

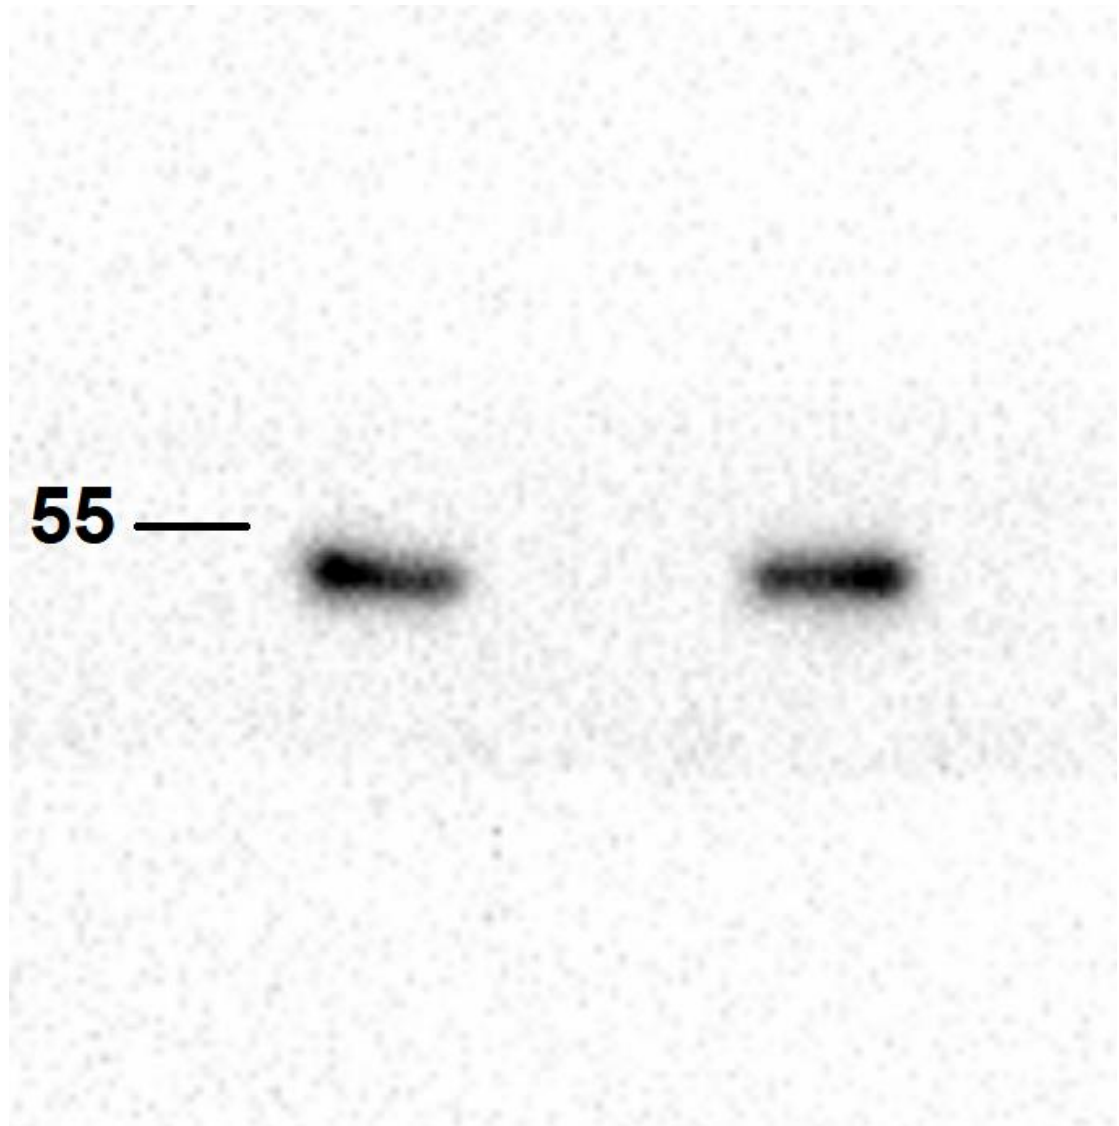

CD81:

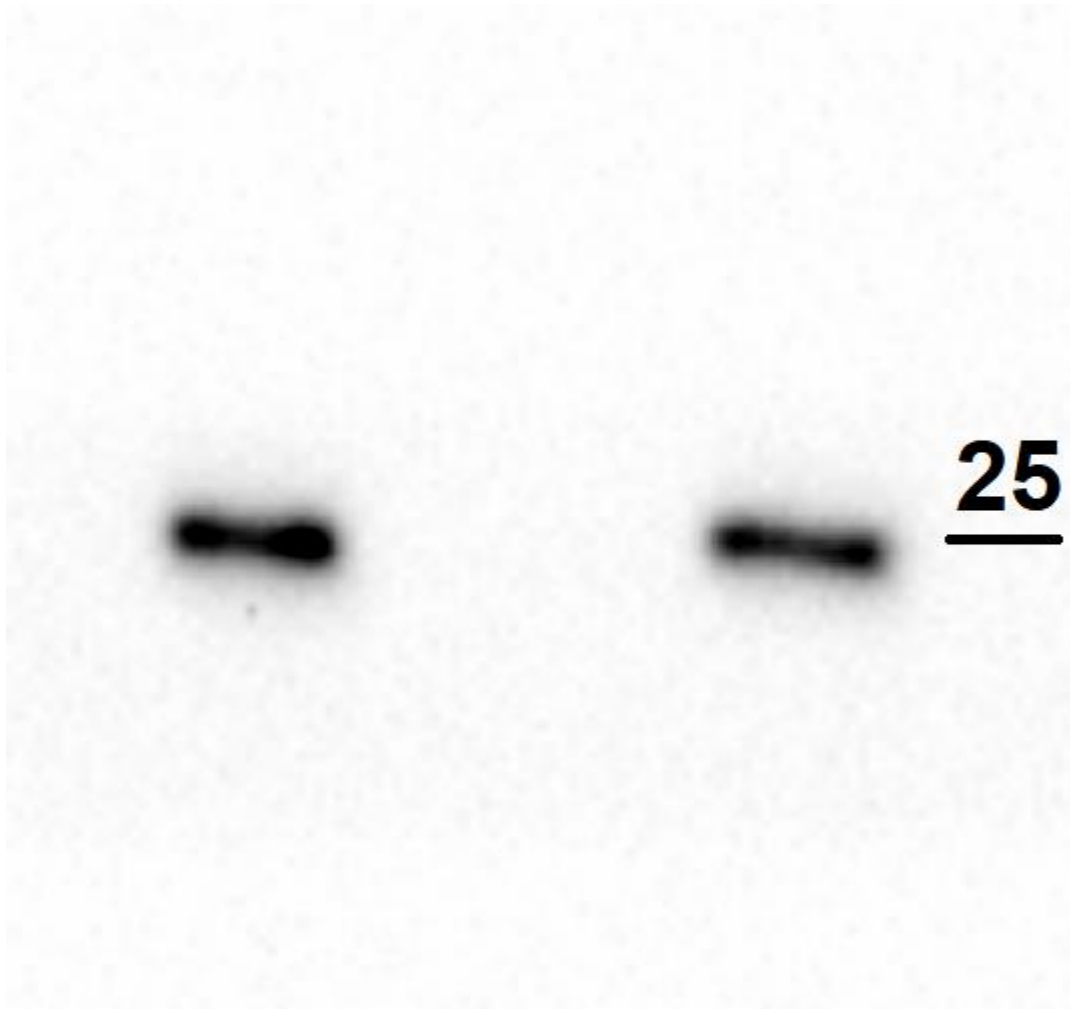

2D:

monocytes, PBS, and monocytes-exo groups:

Calnexin:

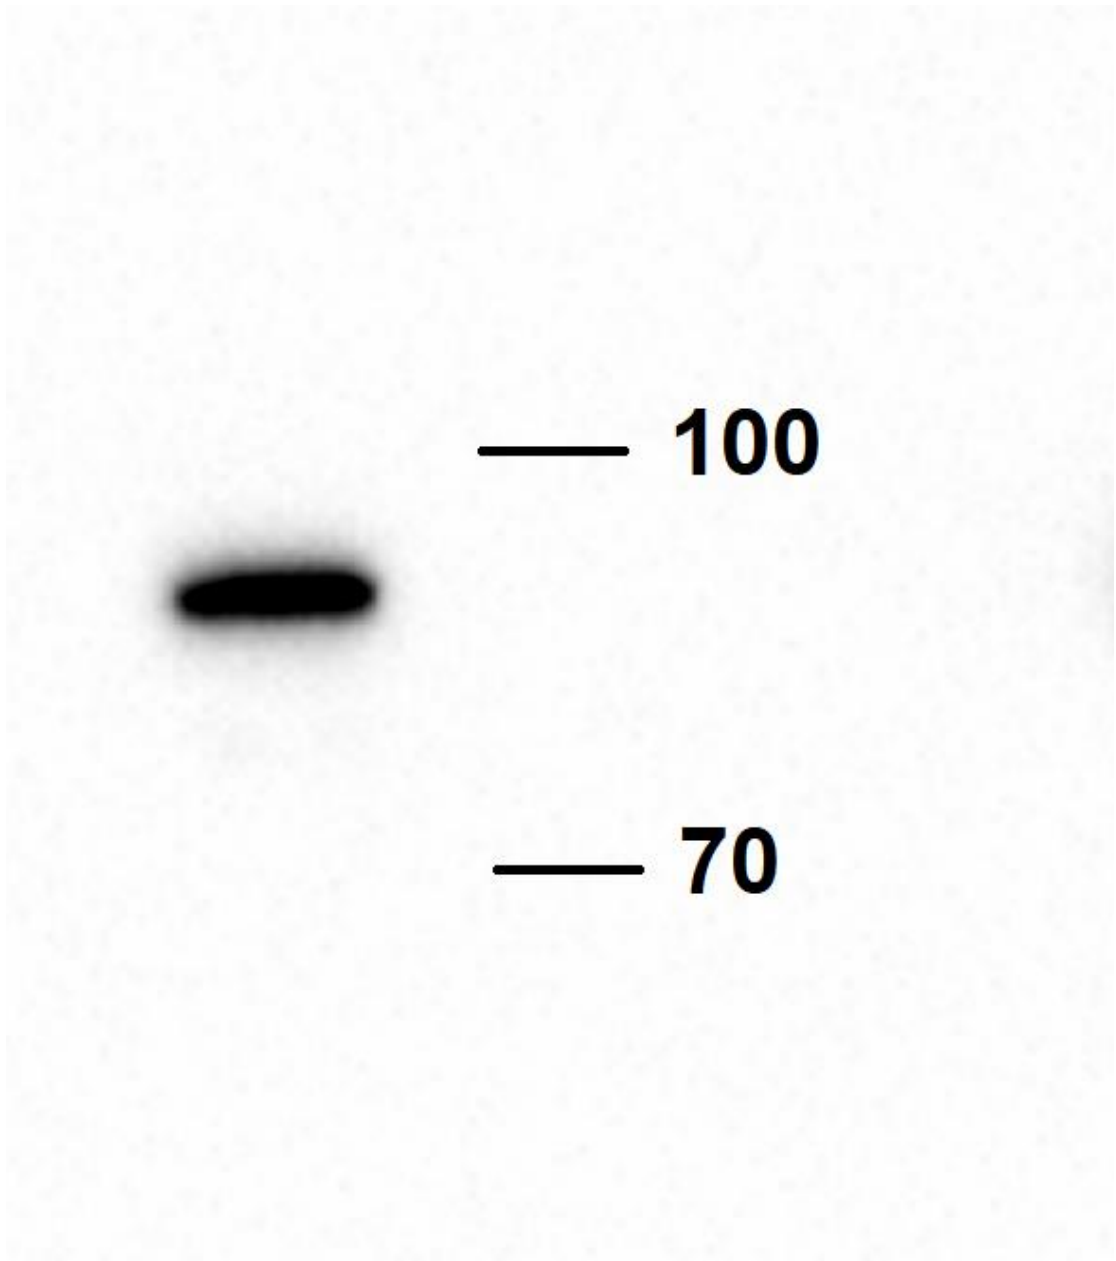

CD63:

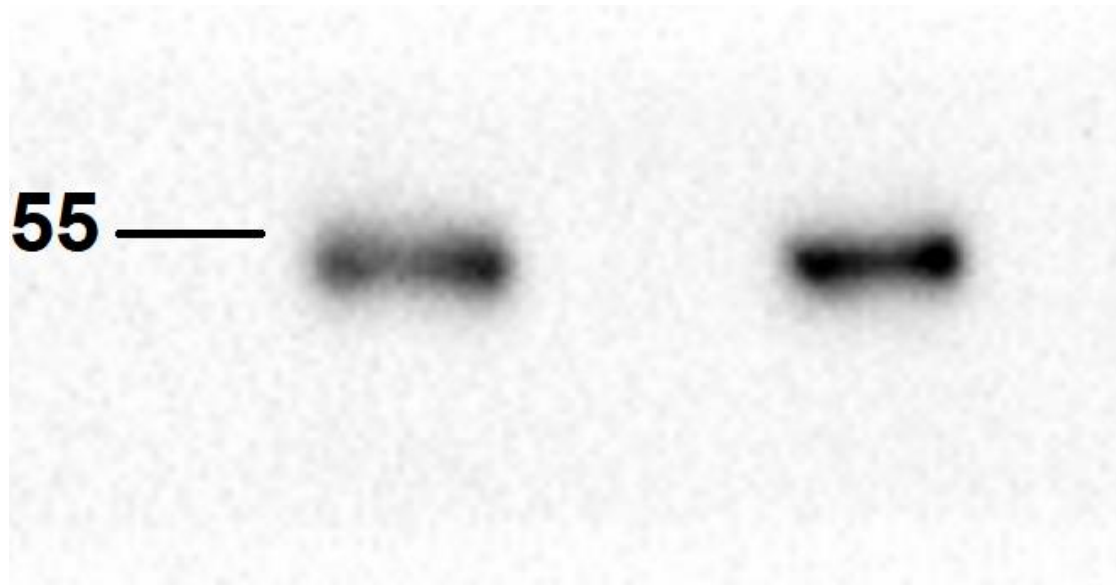

CD81:

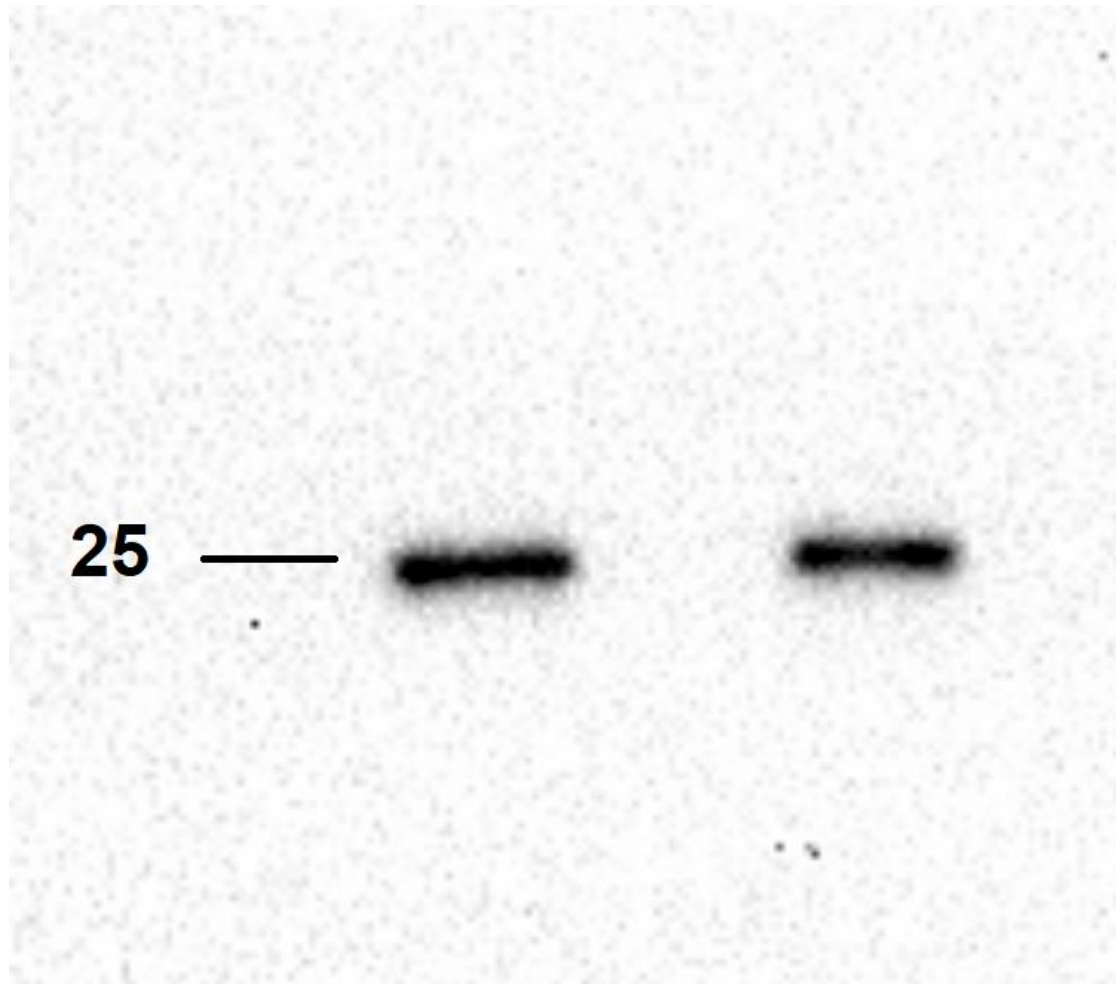

M2, PBS, and groups M2-exo:

Calnexin:



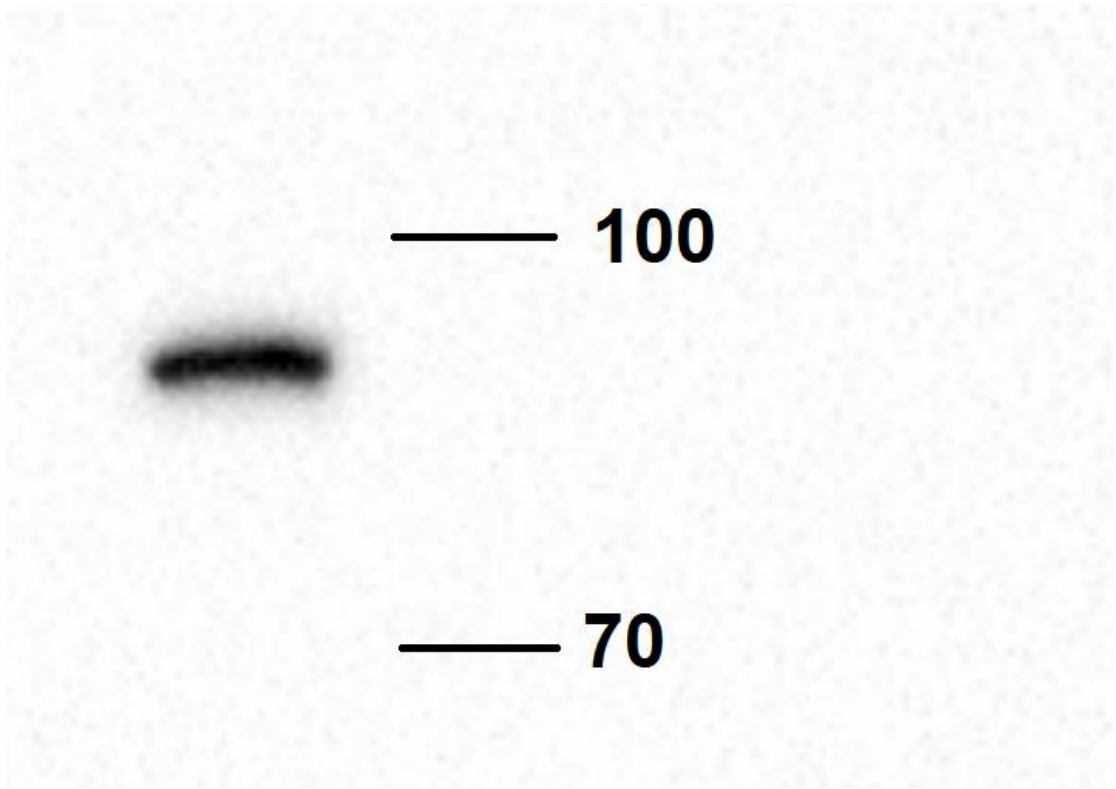

CD63:

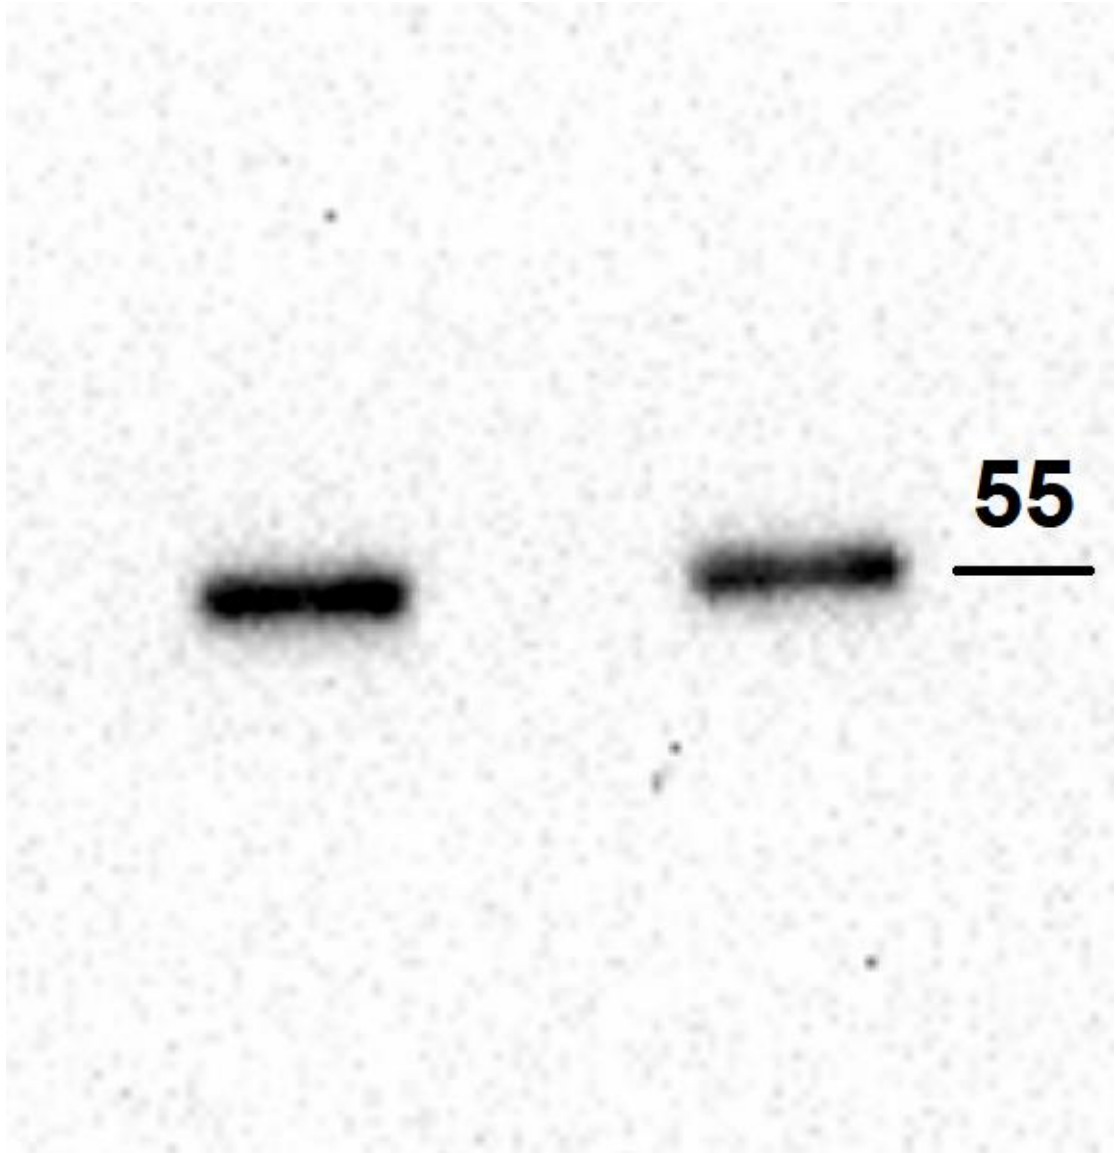

CD81:

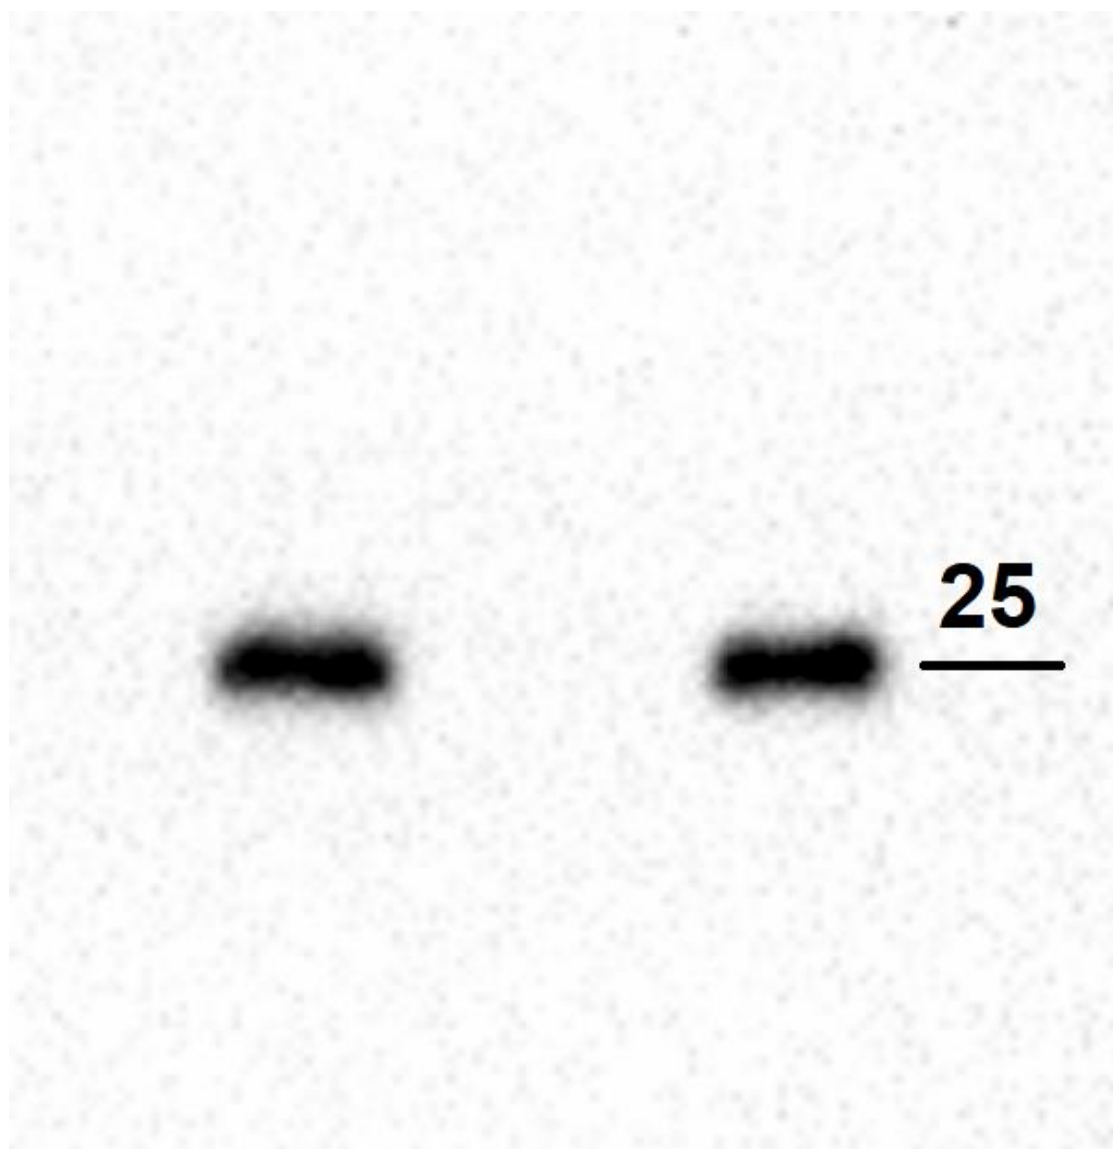

Supplement: EMBR-22-e52124-s004.pdf [file EMBR-22-e52124-s004.pdf]
